# Supplementary material for: Effective stability enhancement in ZnO-based perovskite solar cells by MACl modification
Source: Royal Society of Chemistry journal article supplement (doi:10.1039/d1ta02697f), 2021-01-01
Supplement: d1ta02697f1.pdf [file d1ta02697f1.pdf]

## Supplementary Information

### **Effective stability enhancement in ZnO-based perovskite solar cells by MAI modification**

Chunyu Liu,<sup>ab</sup> Wei Wu,<sup>a</sup> Dezhong Zhang,<sup>c</sup> Zhuowei Li,<sup>a</sup> Guanhua Ren,<sup>a</sup> Wenbin Han,<sup>a</sup> Wenbin Guo<sup>\*a</sup>

<sup>a</sup> State Key Laboratory of Integrated Optoelectronics, College of Electronic Science and Engineering, Jilin University, 2699 Qianjin Street, Changchun 130012, P. R. China

<sup>b</sup> College of Materials Science and Engineering, Jilin University, 2699 Qianjin Street, Changchun 130012, P. R. China

<sup>c</sup> State Key Laboratory of Polymer Physics and Chemistry, Changchun Institute of Applied Chemistry, Chinese Academy of Sciences, Changchun 130022, P. R. China

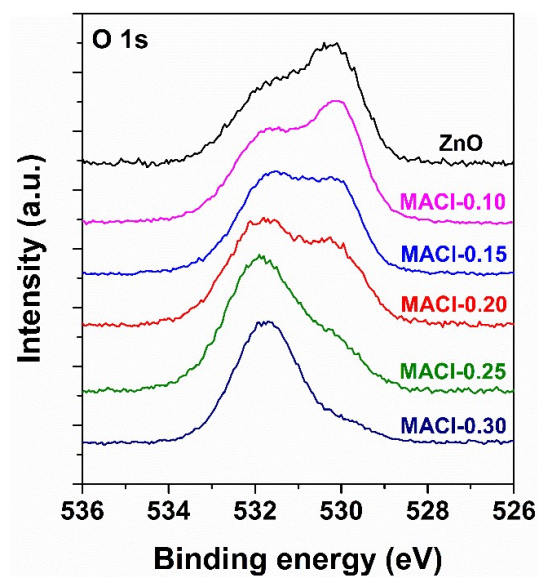

**Fig. S1** XPS spectra of ZnO and ZnO-MACI with different concentrations of MACI depicting the O 1s peaks.

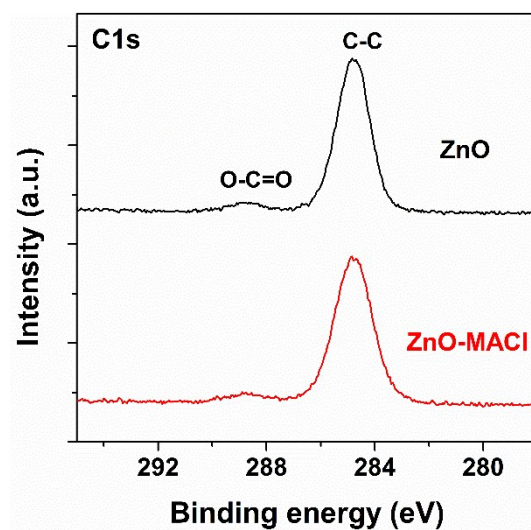

**Fig. S2** XPS spectra depicting the C 1s peaks.

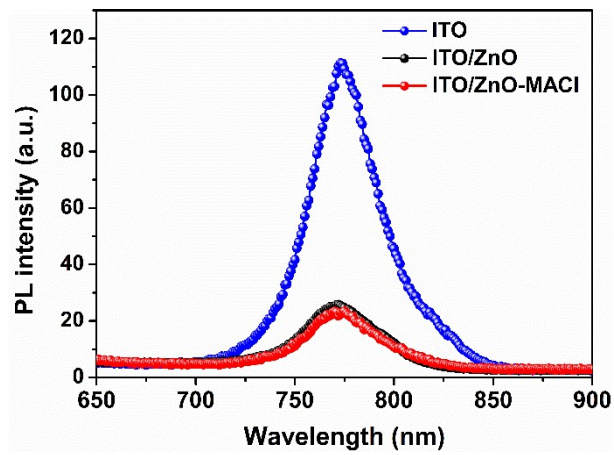

**Fig. S3** PL spectra of MAPbI<sub>3</sub> layers on ITO, ITO/ZnO and ITO/ZnO-MACl.

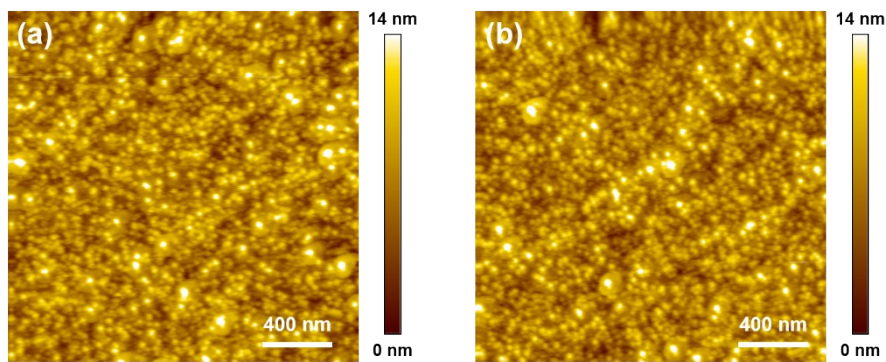

**Fig. S4** AFM images of (a) ZnO and (b) ZnO-MACl with a high magnification.

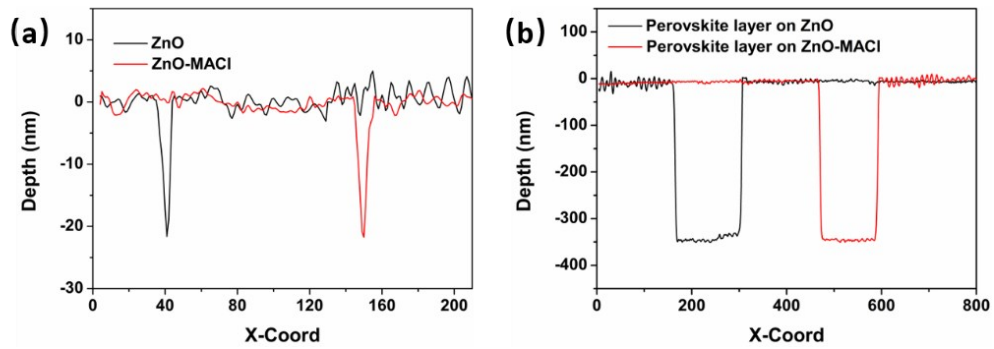

**Fig. S5** Thickness measurements of (a) ETLs and (b) ETL/perovskite layers.

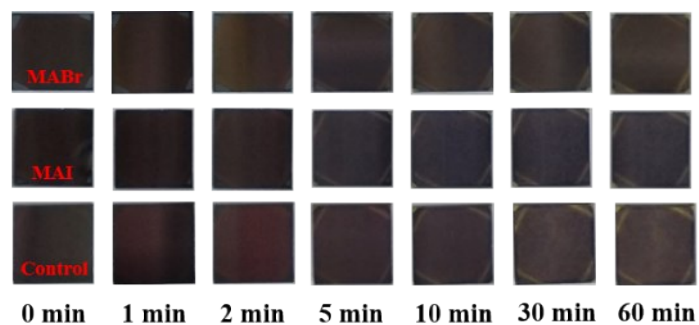

**Fig. S6** Thermal stability of perovskite layers on ZnO-MABr, ZnO-MAI and bare ZnO (control) with the molar concentration of 0.02 mmol/mL.

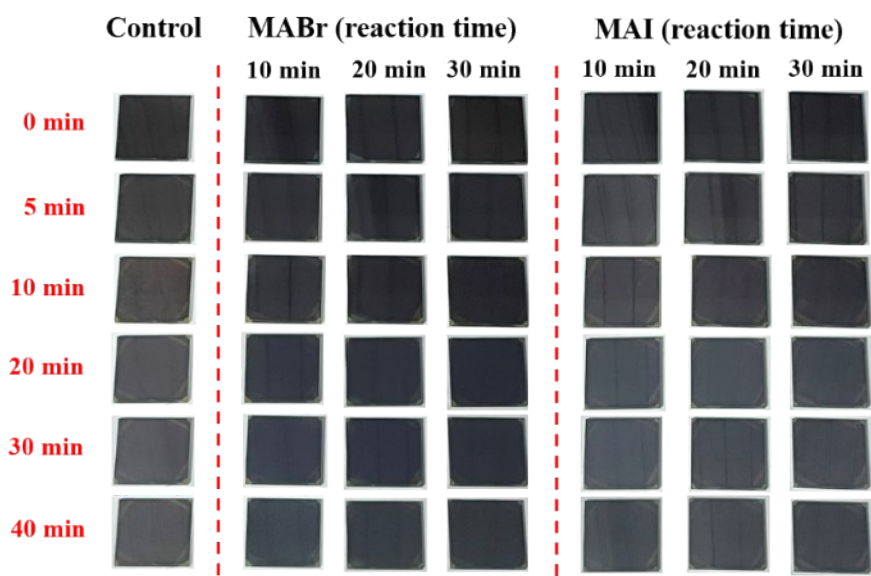

**Fig. S7** Thermal stability of perovskite layers on ZnO-MABr and ZnO-MAI with different reaction time of 10, 20 and 30 min.

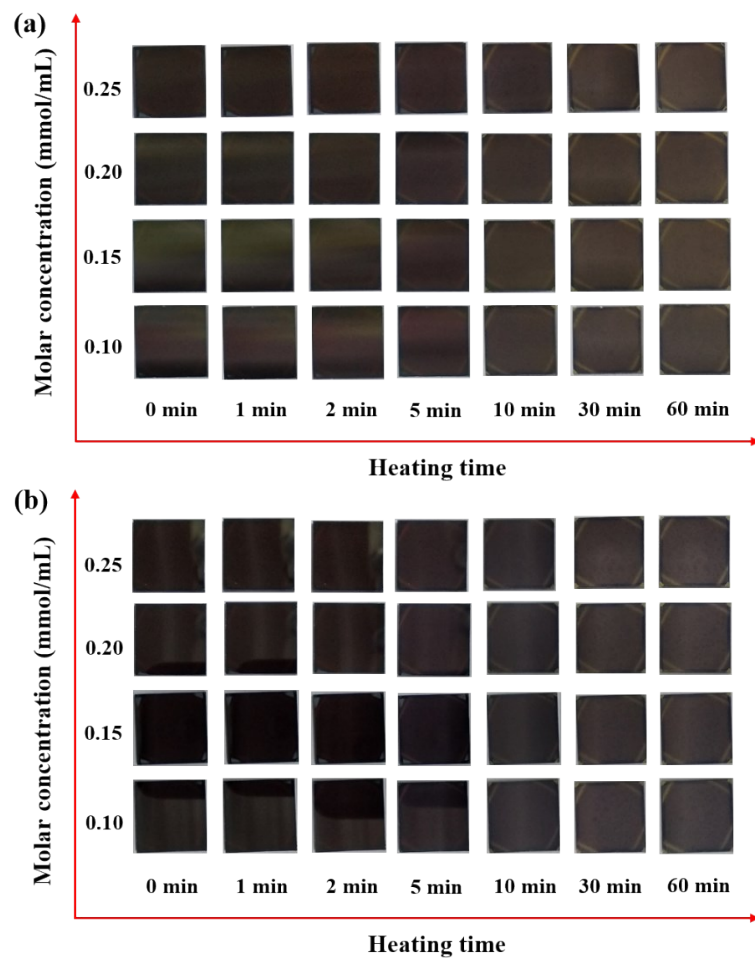

**Fig. S8** Photographs of perovskite layer on (a) ZnO-KCl and (b) ZnO-CsCl heated at 100 °C for different times, and the molar concentrations of KCl and CsCl are 0.10, 0.15, 0.20 and 0.25 mmol/mL.

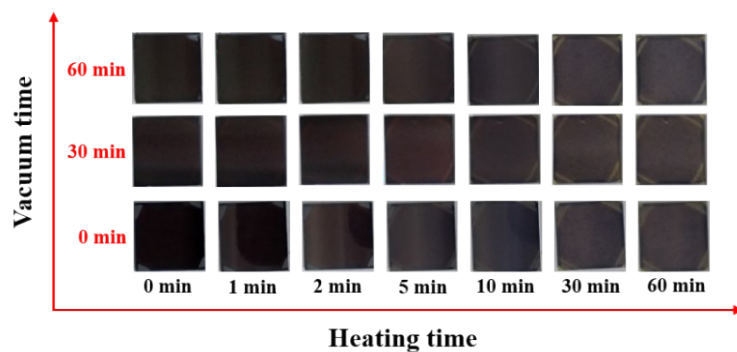

**Fig. S9** Photographs of perovskite layers on ZnO/MACl heated at 100 °C for different times, and the modified MACl is not annealed but vacuum treated for different times before depositing perovskite layer.

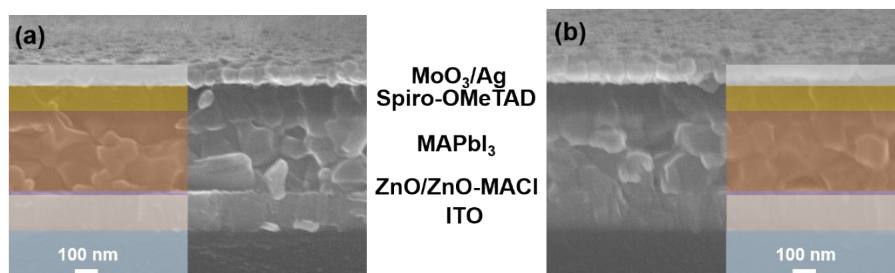

**Fig. S10** Cross-sectional SEM images of PSCs based on (a) ZnO and (b) ZnO-MACl layers.

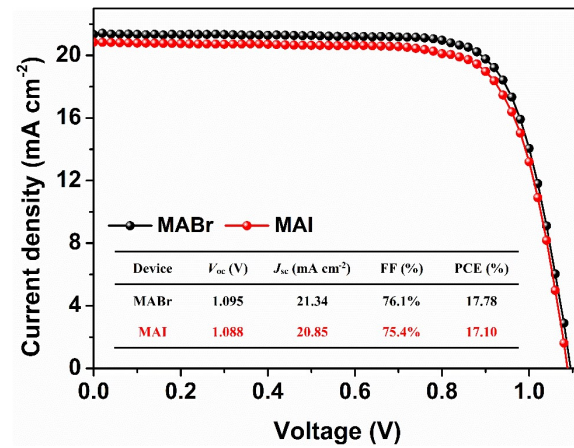

Fig. S11  $J$ - $V$  characteristics of PSCs with MABr and MAI modification.

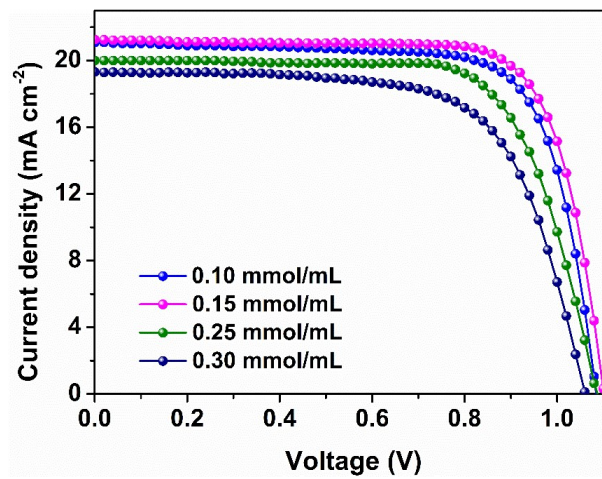

Fig. S12  $J$ - $V$  characteristics of ZnO-MACl-based PSCs with different molar concentrations of MACl.

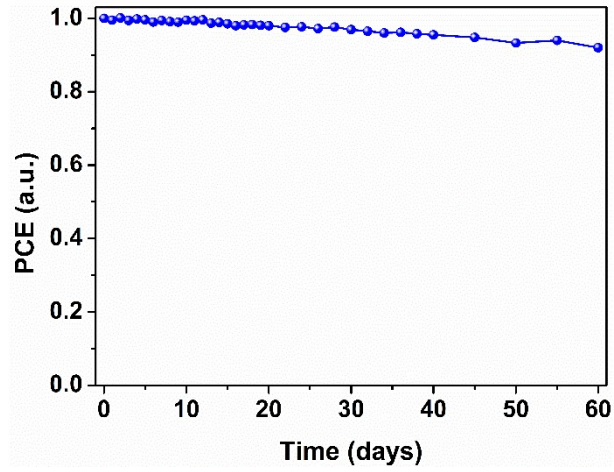

**Fig. S13** Long-term stability of inorganic CsPbI<sub>2</sub>Br-based PSCs with ZnO-MACl layer stored in glove-box for 60 days.



**Table S1.** Photovoltaic parameters of PSCs with ZnO and ZnO-MACl measured by forward and reverse scans, including  $V_{oc}$ ,  $J_{sc}$ , FF and PCE.

| PSCs Devices |         | $V_{oc}$ (V) | $J_{sc}$ (mA cm <sup>-2</sup> ) | FF (%) | PCE (%) |
|--------------|---------|--------------|---------------------------------|--------|---------|
| ZnO          | Reverse | 1.083        | 20.76                           | 73.6   | 16.55   |
|              | Forward | 1.060        | 19.93                           | 61.4   | 12.97   |
| ZnO-MACl     | Reverse | 1.107        | 21.96                           | 77.1   | 18.74   |
|              | Forward | 1.097        | 21.64                           | 75.3   | 17.88   |

**Table S2.** Detailed photovoltaic parameters of ZnO-MACl-based PSCs with varied molar concentrations of MACl.

| Concentrations (mmol/mL) | $V_{oc}$ (v) | $J_{sc}$ (mA cm <sup>-2</sup> ) | FF (%) | PCE (%) |
|--------------------------|--------------|---------------------------------|--------|---------|
| 0.10                     | 1.085        | 21.08                           | 74.4   | 17.02   |
| 0.15                     | 1.101        | 21.49                           | 75.7   | 17.91   |
| 0.25                     | 1.088        | 20.20                           | 71.4   | 15.69   |
| 0.30                     | 1.061        | 19.51                           | 67.3   | 13.93   |
